# Supplementary material for: Efficacy and Safety of MED-01 Probiotics on Vaginal Health: A 12-Week, Multicenter, Randomized, Double-Blind, Placebo-Controlled Clinical Trial
Source: MDPI journal article supplement (doi:10.3390/nu15020331), 2023-01-09
Supplement: s1 [file s1]

**Table S1.** Primer sequence or kit information used for Quantitative Polymerase Chain Reaction (qPCR)

| Species                |   | Primer sequence (5' → 3')         | References |
|------------------------|---|-----------------------------------|------------|
| <i>Mobiluncus</i> spp. | F | CGC AAC CCT TGT CCT ATG TT        | [1]        |
|                        | R | GCG TGA AGC CCA AGA CAT AA        |            |
| <i>A. vaginae</i>      | F | TAG GTC AGG AGT TAA ATC TG        | [2]        |
|                        | R | TCA TGG CCC AGA AGA CCG CC        |            |
| <i>B. fragilis</i>     | F | GGG TAG GAG ACC CTT CTA TT        | [2]        |
|                        | R | CCA TGC CCG CTG ATT AC            |            |
| <i>L. salivarius</i>   | F | GAC ATC CTT TGA CCA CCT AAG       | [3]        |
|                        | R | GGG ACT TAA CCC AAC ATC TC        |            |
| <i>L. fermentum</i>    | F | GAG CGC AAC CCT TGT TAC TA        | [4]        |
|                        | R | GTG TGT AGC CCA GGT CAT AAG       |            |
| <i>L. plantarum</i>    | F | CAA GCG TTG TCC GGA TTT ATT G     | [4]        |
|                        | R | CCA GTT TCC GAT GCA CTT CT        |            |
| <i>L. paracasei</i>    | F | CAT GGG TAG CGA ACA GGA TTA G     | [5]        |
|                        | R | CCC AGG CGG AAT GCT TAA T         |            |
| <i>L. rhamnosus</i>    | F | TGC TTG CAT CTT GAT TTA ATT TTG   | [5]        |
|                        | R | GGT TCT TGG ATT TAT GCG GTA TTA G |            |

\* *A. vaginae*, *Atopobium vaginae*; *B. fragilis*, *Bacteroides fragilis*; *L. salivarius*, *Ligilactobacillus salivarius*; *L. fermentum*, *Limosilactobacillus fermentum*; *L. plantarum*, *Lactiplantibacillus plantarum*; *L. paracasei*, *Lacticaseibacillus paracasei*; *L. rhamnosus*, *Lacticaseibacillus rhamnosus*.

1. Oliveira, L.M.A.; Diniz, C.G.; Fernandes, A.A.S.; Souza-Sotte, D.M.K.; Freitas, M.C.R.; Machado, A.B.F.; Silva, V.L. Assessment of vaginal microbiota in Brazilian women with and without bacterial vaginosis and comparison with Nugent score. *The Journal of Infection in Developing Countries* **2018**, *12*, 127-136.
2. Malaguti, N.; Bahls, L.D.; Uchimura, N.S.; Gimenes, F.; Consolaro, M.E.L. Sensitive detection of thirteen bacterial vaginosis-associated agents using multiplex polymerase chain reaction. *BioMed research international* **2015**, 2015.
3. Lai, C.-H.; Wu, S.-R.; Pang, J.-C.; Ramireddy, L.; Chiang, Y.-C.; Lin, C.-K.; Tsen, H.-Y. Designing primers and evaluation of the efficiency of propidium monoazide–Quantitative polymerase chain reaction for counting the viable cells of *Lactobacillus gasseri* and *Lactobacillus salivarius*. *journal of food and drug analysis* **2017**, *25*, 533-542.

4. Schwendimann, L.; Kauf, P.; Fieseler, L.; Gantenbein-Demarchi, C.; Schwenninger, S.M. Development of a quantitative PCR assay for rapid detection of *Lactobacillus plantarum* and *Lactobacillus fermentum* in cocoa bean fermentation. *Journal of microbiological methods* **2015**, *115*, 94-99.
5. Zhang, R.; Daroczy, K.; Xiao, B.; Yu, L.; Chen, R.; Liao, Q. Qualitative and semiquantitative analysis of *Lactobacillus* species in the vaginas of healthy fertile and postmenopausal Chinese women. *Journal of medical microbiology* **2012**, *61*, 729-739.
